# Supplementary material
Source: PubMed Central journal article supplement (PMC2962496)

## Supplemental figure legends

**Fig. S1. Treatment with Nam, but not TSA, increases acetylation levels of endogenous SREBP-1c in mouse liver extracts.** TSA or Nam was included during preparing nuclear extracts and immunoprecipitation and acetylated SREBP-1c in mouse liver was detected by western analysis using acetyl-lys antibody. SREBP-1c levels were also detected using western analysis (bottom).

**Fig. S2. Expression levels of flag-SREBP-1c wild type and mutants in Cos-1 cells used for in vitro acetylation assays.** In vitro acetylation assays were done using flag-SREBP-1c wild type or mutants according to the Experimental Procedures. Briefly, Cos-1 cells were transfected with plasmids expressing flag-SREBP-1c wild type or mutants and flag-SREBP-1c proteins were isolated and utilized for in vitro acetylation assays. Protein levels of flag-SREBP-1c wild type, K309, or K289/309R double mutants in the input samples were detected by western analysis using M2 antibody. SREBP-1c and nonspecific (NS) band are indicated by an arrow and asterisk, respectively.

**Fig. S3. SIRT1 decreases association of SREBP-1c at the *FAS* gene promoter.** HepG2 cells were transfected with plasmids as indicated and association of SREBP-1c and RNA polymerase II with the *FAS* gene promoter was examined by ChIP assays. After semi-quantitative PCR, band intensities were quantified from 3 experiments using the Image J program and occupancy of SREBP-1c from the control group (cells expressing flag-SREBP-1c only) were set to 1. Statistical significance was determined by the Student's t test, \* indicates  $p < 0.05$  ( $n=3$ ).

**Fig. S4. P300 increases SREBP-1c transactivation activity on *FAS* promoter.** (A) Mouse Hepa1c1c7 cells were cotransfected with 200 ng of *FAS*-luc, 50 ng of pcDNA3.1 SREBP-1c, and 100 ng of CMV-p300. Twenty-four hr after transfection, cells were harvested for reporter assays. The values for firefly luciferase activity were normalized by dividing by values for  $\beta$ -galactosidase activity. The SEM was calculated from triplicate experiments.

**Fig. S5. SIRT1 inhibits SREBP-1c transactivation activity on *FAS* promoter.** (A) Mouse Hepa1c1c7 cells were infected with increasing amounts of either Ad-siSIRT1 or Ad-empty virus, and 48 hr later, cells were cotransfected with 200 ng of *FAS*-luc, 50 ng of pcDNA3.1 SREBP-1c, and 100 ng of CMV-p300. Twenty-four hr after transfection, cells were harvested for reporter assays. The values for firefly luciferase activity were normalized by dividing by values for  $\beta$ -galactosidase activity. The SEM was calculated from triplicate experiments. (B) Cells were infected with increasing amounts of Ad-siSIRT1 or control Ad-empty and 2 days after infection, SIRT1 protein levels were detected by western analysis. Nonspecific (NS) bands are shown (lower panel).

**Fig. S6. Occupancy of SREBP-1c at its own promoter (*SREBP-1c*) is severely impaired with K289/309R double mutant.** HepG2 cells were transfected with SREBP-1c wild type and mutant plasmids as indicated and 24 hr later, cells were treated with insulin (100 nM) for 3 hr in the presence of 0.1 % BSA. Cells were collected for ChIP assays to detect association of RNA polymerase II at the *SREBP-1c* promoter. Consistent results were observed from two independent assays.

**Fig. S7. Overexpression of acetylation-defective SREBP-1c mutants decreases expression of the *FAS* gene.** Mouse Hepa1c1c7 cells were transfected with expression plasmids and 36 h later, cells were treated with insulin (100 nM) and glucose (25 mM) for 2 hr and cells were collected for q-RT-PCR. The mRNA levels of *FAS* gene and control *36B4* gene were detected by q-RT-PCR in parallel. The *FAS* mRNA levels from three samples were normalized to those of *36B4* and average values are plotted.

## Supplemental Figures

Fig. S1

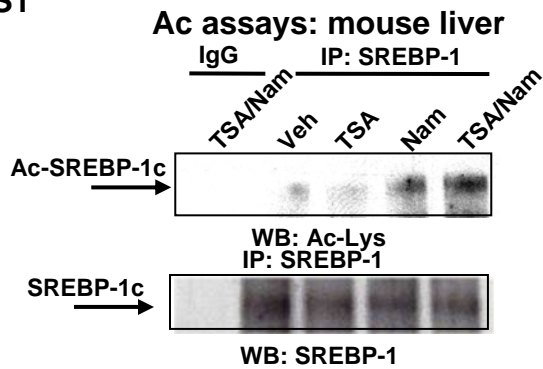

Fig. S2

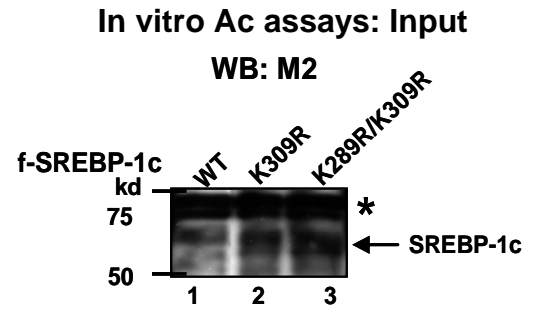

Fig. S3

**SREBP-1c occupancy:  
FAS gene promoter**

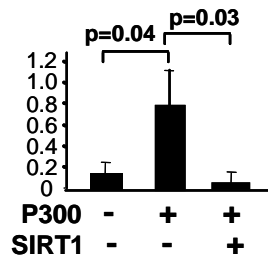

Fig. S4

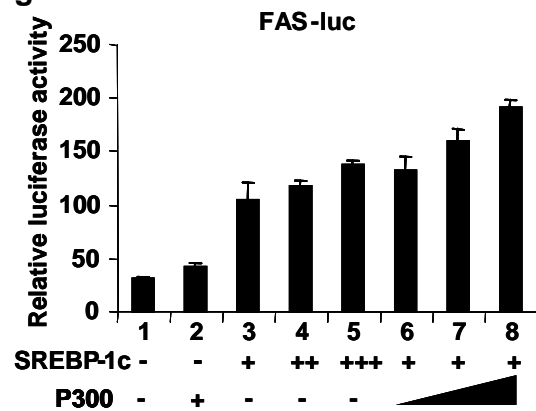

Fig. S5

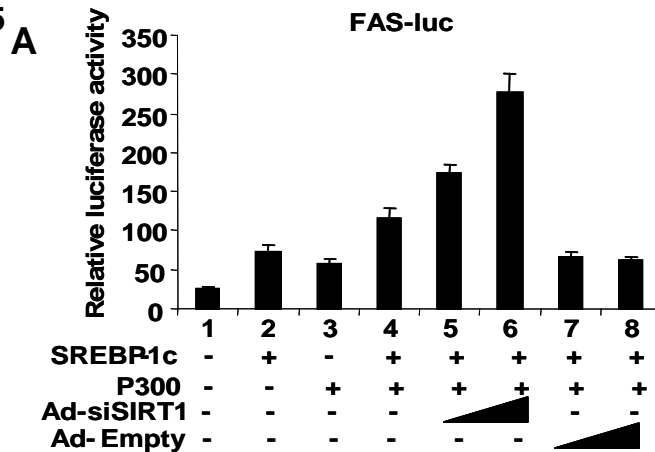

**B**

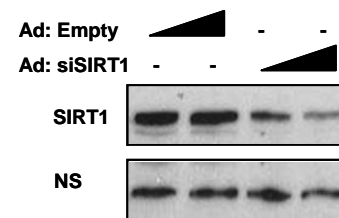

Fig. S6

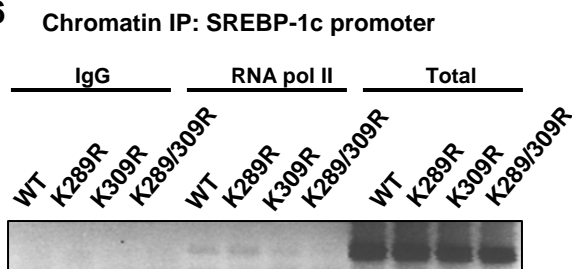

Fig. S7

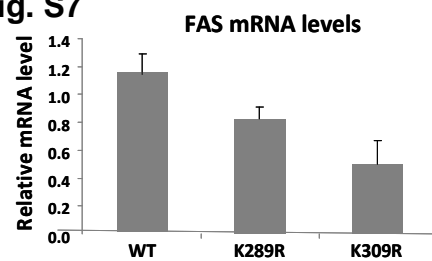

Supplement: supp_M110.122978_jbc.M110.122978-1.pdf [file supp_M110.122978_jbc.M110.122978-1.pdf]
